# Supplementary material
Source: PubMed Central journal article supplement (PMC7553091)
Supplement: sj-pdf-1-ebm-10.1177_1535370220946271.pdf [file sj-pdf-1-ebm-10.1177_1535370220946271.pdf]

**Title**

“Ferrototoxicity and its amelioration by endogenous vitamin D in experimental acute kidney injury”

**Description**

“Supplemental material for Ferrototoxicity and its amelioration by endogenous vitamin D in experimental acute kidney injury by Chandashekar A, Rajesh NG, Pragasam V in Experimental Biology and Medicine”

Chandrashekar Annamalai<sup>a</sup>, Rajesh Nachiappa Ganesh<sup>b</sup> and Pragasam Viswanathan<sup>a</sup>

<sup>a</sup>Renal Research Lab, Center for Biomedical Research, School of Biosciences and Technology, Vellore Institute of Technology (VIT), Vellore - 632 014, Tamil Nadu, India

<sup>b</sup>Department of Pathology, Jawaharlal Institute of Postgraduate Medical Education and Research (JIPMER), Dhanvantri Nagar, Puducherry 605 006, India

**Running title: CATALYTIC IRON AND VITAMIN D IN ACUTE KIDNEY INJURY**

**<sup>a</sup>Corresponding author:**

Dr. Pragasam Viswanathan,  
Professor and Dean,  
Renal Research Lab,  
Centre for Biomedical Research,  
School of Biosciences and Technology,  
Vellore Institute of Technology (VIT),  
Vellore - 632 014,  
Tamil Nadu,  
India.  
+91-416-220 2583, +91-9487320969  
pragasam.v@vit.ac.in / dean.sbst@vit.ac.in

## **Supplementary material 1**

### **Quantitative real-time PCR (qRT-PCR) analysis of iron-regulatory and 1 $\alpha$ -hydroxylase genes**

Freshly harvested kidneys from control and experimental rats were frozen using liquid nitrogen. Total RNA was extracted using TRIzol reagent (Sigma Aldrich, St. Louis, MO). 2 mg RNA was reverse transcribed to cDNA utilizing the higher capacity cDNA reverse transcription kit (Applied Biosystems, Foster City, CA) and the mRNA expression was amplified by Quantitect SYBR<sup>®</sup> PCR kit (QIAGEN, Valencia, CA). Gene-specific primers were designed manually using NCBI/primer-BLAST tool software (supplementary table 1) and were purchased from Sigma Aldrich. qRT-PCR was performed to quantify transferrin receptors 1 and 2, ferritin, hepcidin, ferroportin and 1  $\alpha$ -hydroxylase (CYP27B1) genes. Transcription levels were assessed by the step one real-time thermal cycler with SYBR Green PCR master mix as per the manufacturer's instructions (Applied Biosystems, Foster City, CA). Amplification was carried out in the following cycling conditions: 94°C for 15 seconds, 60°C annealing for 30 seconds and 72°C extension for 30 seconds. The fold change in gene expression levels of the target genes was determined with normalization to  $\beta$ -actin values using the 2- $\Delta\Delta$ Ct Comparative cycle threshold method. Each gene analysis was performed in triplicate.

**Supplementary Table 1** Primer sequences used for qRT-PCR analysis of mRNA

| Gene                                 | Primer sequences                                                         |
|--------------------------------------|--------------------------------------------------------------------------|
| Transferrin receptor 1               | Forward 5' TTCAGGGAAGCTCTGTCGTT 3'<br>Reverse 5' CTTTCTAAAGCCCGCAAGTG 3' |
| Transferrin receptor 2               | Forward 5' GACCCTGCAGTGGGTGTA 3'<br>Reverse 5' AGCATCCGTAGGTGTTCCAC 3'   |
| Ferritin                             | Forward 5' ATGATGTGGCCCTGAAGAAC 3'<br>Reverse 5' GTGCACACTCCATTGCATTC 3' |
| Hepcidin                             | Forward 5' ACAGAAGGCAAGATGGCACT 3'<br>Reverse 5' GAAGTTGGTGTCTCGCTCC 3'  |
| Ferroportin                          | Forward 5' CCCTGCTCTGGCTGTA 3'<br>Reverse 5' GAAGTTGGTGTCTCGCTCC 3'      |
| 1 $\alpha$ -hydroxylase<br>(CYP27B1) | Forward 5' ACACCTAGCTTCCTGGCTGA 3'<br>Reverse 5' AGCGCTCTGGACAATGACTT 3' |
